1     **Host protease activity on bacterial pathogens promotes complement-**  
2                                   **and antibiotic-directed killing**

3  
4     Shaorong Chen<sup>1+</sup>, Alexandria-Jade Roberts<sup>1</sup>, Felix Lu<sup>1</sup>, Marie R. Southerland<sup>1</sup>, Carolyn Cannon<sup>1</sup>,  
5                                   Qing-Ming Qin<sup>1\*</sup>, Paul de Figueiredo<sup>1,2\*</sup>

6  
7  
8     <sup>1</sup> Department of Microbial Pathogenesis and Immunology, Texas A&M Health Science Center,  
9     Byran, TX 77807

10    <sup>2</sup> Department of Veterinary Pathobiology, Texas A&M University, College Station, TX 77843

11  
12  
13    \*Address correspondence to Qing-Ming Qin, [qmqin@tamu.edu](mailto:qmqin@tamu.edu); Paul de Figueiredo,  
14    [pjdefigueiredo@tamu.edu](mailto:pjdefigueiredo@tamu.edu)

15  
16  
17    Running title: Protease promotes complement-mediated bacteria-killing

18  
19  
20  
21  
22

1 **ABSTRACT**

2 **Our understanding of how the host immune system thwarts bacterial evasive mechanisms**  
3 **remains incomplete. Here, we show that host protease neutrophil elastase acts on *Acinetobacter***  
4 ***baumannii* and *Pseudomonas aeruginosa* to destroy factors that prevent serum-associated,**  
5 **complement-directed killing. The protease activity also enhances bacterial susceptibility to**  
6 **antibiotics in sera. These findings implicate a new paradigm where host protease activity on**  
7 **bacteria acts synergistically with the host complement system and antibiotics to defeat bacterial**  
8 **pathogens.**

9

10 **Keywords:** Host immune system, Protease neutrophil elastase, Bacterial pathogens, Multi-drug  
11 resistant bacteria, Host complement system, Antibiotics

12

13 The human immune system deploys distinct innate immune mechanisms to thwart bacterial  
14 pathogens. These mechanisms include the host complement system and host proteases that are present  
15 at sites of bacterial infection. The complement system, a network of proteins in sera that are activated  
16 by microbial patterns, provides a first line of immune defense (1). Activation results in the deposition  
17 of complement proteins on bacterial surfaces, thereby labeling bacteria for phagocytic uptake and  
18 subsequent killing. In addition, complement deposition on bacteria drives the formation of the  
19 membrane attack complex on bacterial surfaces, which kills Gram-negative bacteria via pore  
20 formation. Host proteases, released by immune cells, also contribute to bacterial killing by  
21 compromising the integrity of bacterial cell walls (2). In addition, these proteases can destroy  
22 virulence factors and thereby thwart bacterial pathogenesis (3). To survive within the human host,  
23 bacteria have evolved systems to circumvent, subvert or evade these innate immune defense  
24 mechanisms (4). However, the ways in which the host immune system can overcome these immune-

1 evasive bacterial factors constitute a gap in our understanding. Here, we demonstrate that host  
2 protease activity on bacterial cell surfaces can destroy bacterial-associated complement inhibitory  
3 activities, thereby rendering resistant bacteria susceptible to complement-directed killing and  
4 sensitive to frontline antibiotics. Our studies featured the use of three clinically or agriculturally  
5 significant bacterial species: *Pseudomonas aeruginosa* (Pa), *Acinetobacter baumannii* (Ab) and  
6 *Brucella melitensis* (Bm). Pa and Ab are opportunistic bacterial pathogens that constitute significant  
7 threats to civilian and warfighter personnel, as well as patients with underlying disease, including  
8 cystic fibrosis (5, 6). Importantly, a significant proportion of clinical isolates of these pathogens  
9 display resistance to killing by normal human serum (HS) (7). Moreover, we analyzed a vaccine strain  
10 of Bm, the world's most prevalent bacterial zoonotic agent that displays complement resistance (8).

11  
12 To test the hypothesis that protease activity on bacteria confers enhanced sensitivity to complement  
13 killing in HS, we used a checkerboard strategy (9) to assess synergistic interactions. Briefly, we co-  
14 incubated the above-mentioned bacterial strains at  $1 \times 10^7$  CFU/mL in the presence of various  
15 concentrations (0 ~ 20%) of pooled human complement serum (HS, Innovative Research, IC SER100)  
16 and neutrophil elastase (NE, EMD Millipore, 324681) (0 ~ 0.3 U/mL) at 37°C. We then determined  
17 bacterial growth by measuring the OD<sub>600</sub> of the culture using a plate reader (BioTek, Inc., VT, USA)  
18 at 16 (Pa and Ab) or 72 (Bm) hr post-inoculation (h.p.i.) to assess the inhibitory and/or synergistic  
19 activity of HS and NE on the survival or growth of the tested bacteria. Pa strain PAO1 displayed  
20 reduced turbidity in 7.5% HS and did not grow when treated with 0.05 U/mL of NE (**Fig. S1A, B**).  
21 In 5% HS and 0.1 U/mL of NE, the strain displayed poor growth; however, the turbidity of the cultures  
22 was significantly reduced by 0.3 U/mL of NE (**Fig. 1A; Fig. S1A, B**). Pa strain PA14 was weakly  
23 resistant to 2.5% HS and growth of this strain was strongly inhibited when treated with greater than  
24 0.1 U/mL NE at this concentration of HS (**Fig. S1A, C**). To explore the hypothesis that NE targeting

1 of protease-labile components on bacterial cell surfaces promoted complement directed killing, we  
2 performed similar experiments using PAO1 strains that harbored mutations in the *Ecotin*, *Wzz* or *AprI*  
3 genes. *Ecotin* and *Wzz* contribute to complement resistance (10, 11). *AprI* is an inhibitor of *AprA* that  
4 protects PAO1 from complement killing. We found that the strains harboring deletions in *Ecotin* and  
5 *Wzz* were sensitive to 5% HS (**Fig. 1B-C**), indicating that both *Ecotin* and *Wzz* genes were required  
6 for Pa resistance to complement-directed killing. In addition, the PAO1 $\Delta$ *AprI* mutant displayed  
7 enhanced resistance to complement killing and grew well in 5% HS, but was weakly inhibited in 10%  
8 HS (**Fig. 1D**). Ab strain Ab5075 displayed resistance to 5% HS but increased sensitivity when treated  
9 with NE from 0.1 to 0.3 U/mL (**Fig. 1E**). When treated with 0.3 U/mL NE, the strain displayed  
10 reduced growth in 1.25% HS, strong growth inhibition in 2.5% HS, and no growth in 5% HS (**Fig.**  
11 **1E**). The Bm vaccine strain Bm16M $\Delta$ *vjbR* displayed more resistance to complement killing than  
12 Ab5075 and PAO1. Bm16M $\Delta$ *vjbR* displayed growth in 15% HS in the presence of NE concentrations  
13 of  $\leq 0.05$  U/mL; however, NE treatment increased bacterial sensitivity to HS. When treated with more  
14 than 0.1 U/mL of NE, the growth of the Bm strain was inhibited (**Fig. 1F**). Interestingly,  
15 Bm16M $\Delta$ *vjbR* grew better in HS (< 10%) than non-HS containing medium (**Fig. 1F**). To verify that  
16 a heat-labile proteinaceous component of HS was mediating the observed killing activity, we  
17 measured bacterial survival in reaction mixtures that contained heat-treated HS. Briefly, HS was heat-  
18 inactivated at 55°C for 0.5 h or 65°C for 1 h and then incubated with PAO1 or Ab5075. Under these  
19 conditions, no inhibition of bacterial growth was observed, and the synergistic effect observed with  
20 non-heat-killed HS was eliminated (**Fig. 1G, H; Fig. S1E**). Interestingly, NE simultaneous  
21 coincubation with HS results in better bacterial growth inhibition than subsequent addition of HS (**Fig.**  
22 **1I, J**), suggesting that a longer period of NE and HS coincubation yields a better synergistic effect in  
23 HS (2.5~5%).

1  
2 Taken together, the data support the hypothesis that synergistic interactions between protease  
3 activities and complement-directed killing promote the destruction of Gram negative bacterial  
4 pathogens. We were intrigued whether these findings could be extended by determining whether  
5 protease activity on multi-drug resistant bacteria could enhance sensitivity to front-line antibiotics.  
6 Toward this end, we measured the growth of bacteria in the presence of tobramycin (TCI American,  
7 Portland, OR, USA). Ab5075 was weakly resistant to 25 µg/mL tobramycin; however, both PAO1  
8 and PA14 displayed sensitivity to tobramycin at this concentration (**Fig. 2A-C**). NE (0.1 to 0.3 U/mL)  
9 treated Ab5075 was susceptible to 25 µg/mL tobramycin in 2.5% HS and this treatment displayed a  
10 synergistic effect on bacterial killing; NE-treated PAO1 and PA14 were susceptible to 12.5 µg/mL  
11 tobramycin (**Fig. 2D-F**). Collectively, these data demonstrated a synergistic interaction between  
12 protease activity on bacteria and antibiotic treatment in driving the killing of bacterial pathogens; and  
13 providing a new avenue for bacterial disease management.

14

#### 15 **Data availability**

16 This study did not generate/analyze datasets or code.

17

#### 18 **Acknowledgments**

19 This work was supported by the Defense Advanced Research Projects Agency (DARPA)  
20 (HR001118A0025-FoF-FP-006), NIH (R21AI139738-01A1, 1 R01AI141607-01A1, 1R21GM132705-  
21 01), the National Science Foundation (DBI 1532188, NSF0854684), the Bill Melinda Gates  
22 Foundation and the Texas A&M Clinical Science Translational Research Institute Pilot Grant  
23 CSTR2016-1 to PdF. Any opinions, findings, and conclusions or recommendations expressed in this  
24 material are those of the author(s) and do not necessarily reflect the views of the funding agencies.

25

## 1 References

- 2 1. Heesterbeek DAC, Angelier ML, Harrison RA, Rooijackers SHM. Complement and Bacterial Infections:  
3 From Molecular Mechanisms to Therapeutic Applications. *J Innate Immun.* 2018;10(5-6):455-64.
- 4 2. Tarhini MFH, Bentaher A, Greige-Gerges H, Elaissari A. A potential new strategy for using elastase and  
5 its inhibitor as therapeutic agents. *Journal of Translational Science.* 2018.
- 6 3. Kobayashi SD, Malachowa N, DeLeo FR. Neutrophils and Bacterial Immune Evasion. *J Innate Immun.*  
7 2018;10(5-6):432-41.
- 8 4. Janeway Jr CA, Travers P, Walport M, Shlomchik MJ. Pathogens have evolved various means of evading  
9 or subverting normal host defenses. *Immunobiology: The Immune System in Health and Disease* 5th  
10 edition: Garland Science; 2001.
- 11 5. Diggle SP, Whiteley M. Microbe Profile: *Pseudomonas aeruginosa*: opportunistic pathogen and lab rat.  
12 *Microbiology (Reading).* 2020;166(1):30-3.
- 13 6. Howard A, O'Donoghue M, Feeney A, Sleator RD. *Acinetobacter baumannii*: an emerging opportunistic  
14 pathogen. *Virulence.* 2012;3(3):243-50.
- 15 7. Sanchez-Larrayoz AF, Elhosseiny NM, Chevrette MG, Fu Y, Giunta P, Spallanzani RG, et al. Complexity  
16 of Complement Resistance Factors Expressed by *Acinetobacter baumannii* Needed for Survival in Human  
17 Serum. *J Immunol.* 2017;199(8):2803-14.
- 18 8. Hensel ME, Garcia-Gonzalez DG, Chaki SP, Hartwig A, Gordy PW, Bowen R, et al. Vaccine Candidate  
19 *Brucella melitensis* 16MΔvjbR Is Safe in a Pregnant Sheep Model and Confers Protection. *Msphere.*  
20 2020;5(3).
- 21 9. Martinez-Irujo JJ, Villahermosa ML, Alberdi E, Santiago E. A checkerboard method to evaluate  
22 interactions between drugs. *Biochemical pharmacology.* 1996;51(5):635-44.
- 23 10. Kintz E, Scarff JM, DiGiandomenico A, Goldberg JB. Lipopolysaccharide O-antigen chain length  
24 regulation in *Pseudomonas aeruginosa* serogroup O11 strain PA103. *J Bacteriol.* 2008;190(8):2709-16.
- 25 11. Tseng BS, Reichhardt C, Merrihew GE, Araujo-Hernandez SA, Harrison JJ, MacCoss MJ, et al. A Biofilm  
26 Matrix-Associated Protease Inhibitor Protects *Pseudomonas aeruginosa* from Proteolytic Attack. *mBio.*  
27 2018;9(2).
- 28

## 1 Figure and Figure legends

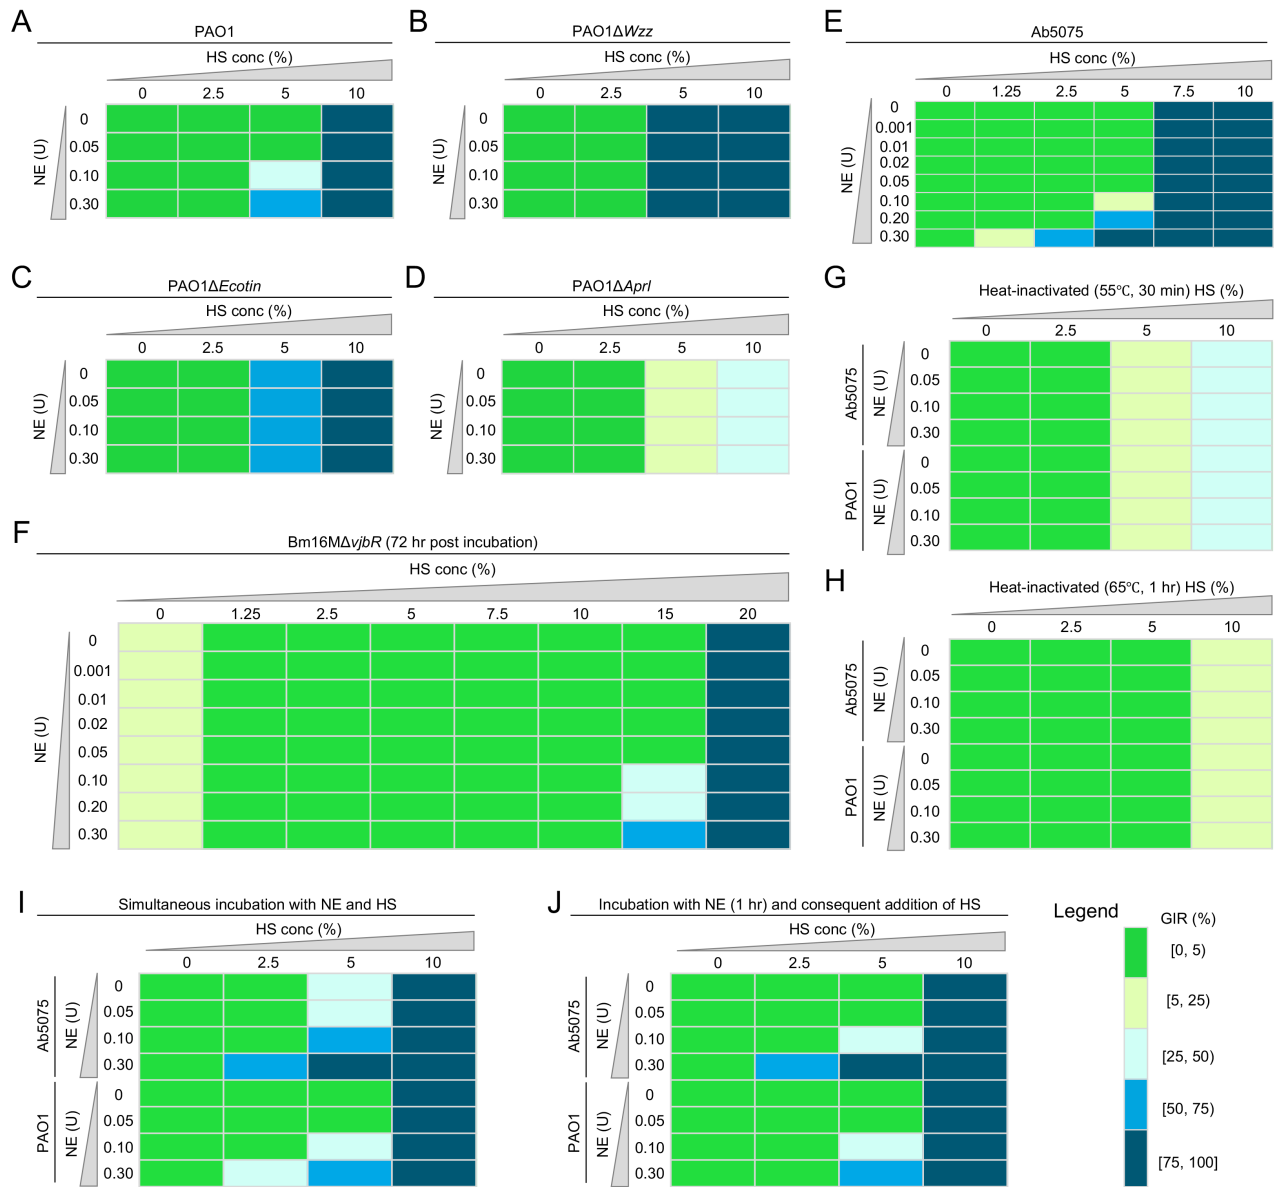

2 **Figure 1. Synergistic effect of neutrophil elastase (NE) and human serum (HS) on bacterial**  
3 **growth.** (A-D) Synergy of protease and serum on bacterial pathogens *P. aeruginosa* PAO1 (A) and  
4 its derived mutants PAO1Δ*Ecotin* (B), PAO1Δ*Wzz* (C), PAO1Δ*AprI* (D). (E, F) NE promotes *A.*  
5 *baumannii* Ab5075 (E) or *B. melitensis* Bm16MΔ*vjbR* (F) killing in the presence of HS. (G, H)  
6 Bacterial killing effect of NE decreases in the presence of heat-treated serum at 55°C, 30 min (G) or  
7 at 65°C for 1 h (H). (I, J) Addition of NE in HS at the same time (I) or at 1 h post incubation of HS  
8 and bacteria (J) varies the synergistic effect. Growth inhibition rate (GIR, %) = [(Contrl OD<sub>600</sub> –  
9 treatment OD<sub>600</sub>)/Contrl OD<sub>600</sub>] $\times$ 100%. “[” or “]” and “(” or “)” indicate inclusion and exclusion,  
10 respectively.

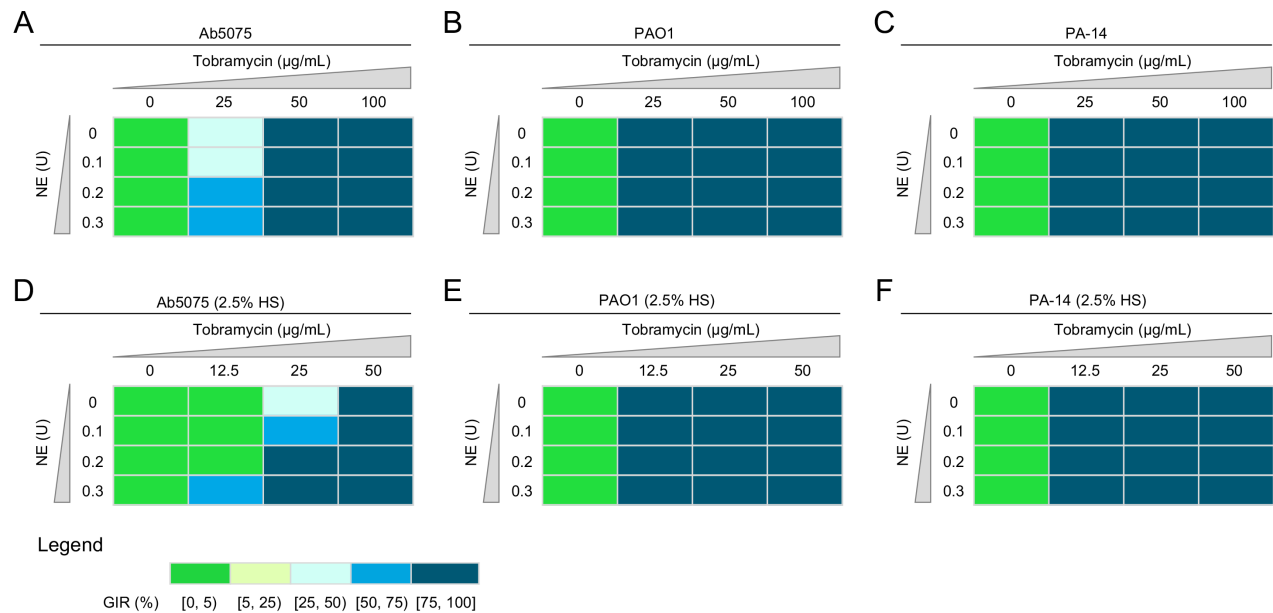

1 **Figure 2. Synergistic effect of NE and tobramycin and/or HS on bacterial killing.** (A-C) NE  
2 promotes *A. baumannii* Ab5075 (A), *P. aeruginosa* PAO1 (B), or PA-14 (C) killing in the presence  
3 of tobramycin. (C-D) Synergy of NE and tobramycin on *A. baumannii* Ab5075 (D), PAO1 (E), or  
4 PA-14 (F) killing in the presence of 2.5% HS.

5

6



## 1 Supplemental Information

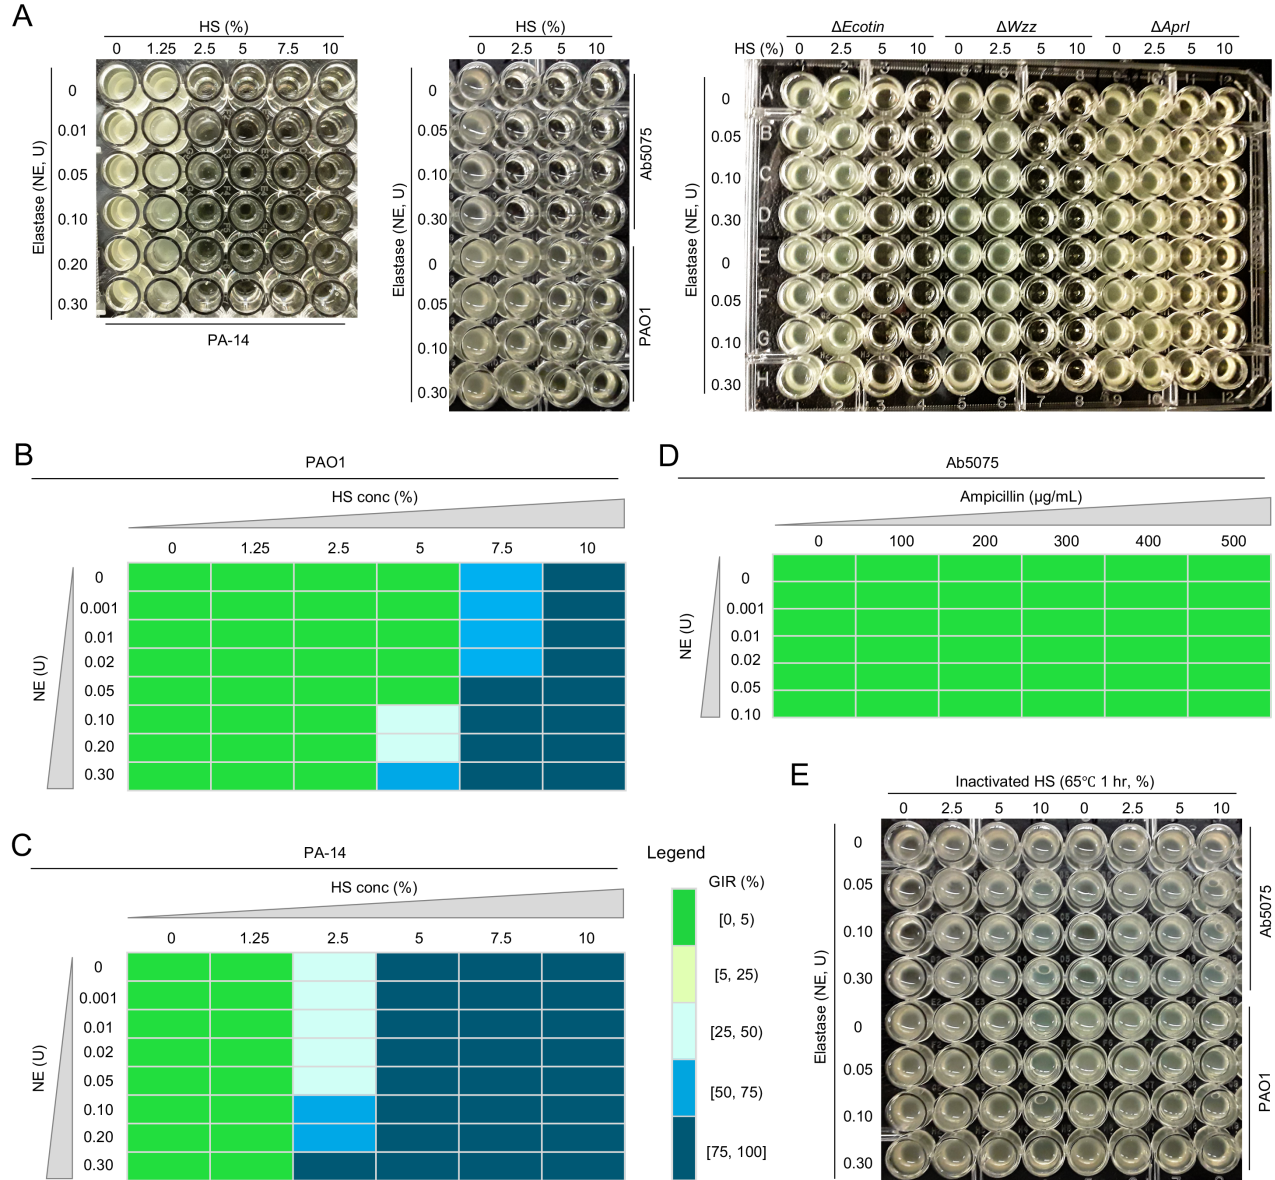

2 **Figure S1. Effect of NE and HS or Ampicillin on bacterial killing.** (A) Growth inhibition assays  
 3 of the bacterial pathogens *P. aeruginosa* PA-14, PAO1, and *A. baumannii* Ab5075 in the indicated  
 4 concentrations of neutrophil elastase (NE) and normal human serum (HS). (B-C) Synergy of NE and  
 5 HS on the tested bacterial strains PAO1 (B) and PA-14 (C). (D) NE fails to promote Ab5075 killing  
 6 in the presence of Ampicillin at the indicated concentrations. (E) Heat-inactivated HS fails to promote  
 7 NE bacterial killing. Growth inhibition rate (GIR, %) =  $[(\text{Contrl OD}_{600} - \text{treatment OD}_{600}) / \text{Contrl}$   
 8  $\text{OD}_{600}] \times 100\%$ . “[” or “]” and “(” or “)” indicate inclusion and exclusion, respectively. Pictures from  
 9 a representative experiments of at least three independent experiments.
